# Supplementary material
Source: PubMed Central journal article supplement (PMC5753582)
Supplement: NIHMS927513-supplement-Table_1.pdf [file NIHMS927513-supplement-Table_1.pdf]

Supplemental Table 1. The prediction of HCS, RO2 and their combination for a total of 70 drugs tested by rat primary hepatocytes based assays

| <b>Compounds</b> | <b>Human DILI</b> | <b>HCS prediction</b> | <b>RO2</b> | <b>RO2-HCS</b> |
|------------------|-------------------|-----------------------|------------|----------------|
| acitretin        | DILI Positive     | Positive              | Negative   | Positive       |
| amiodarone       | DILI Positive     | Positive              | Positive   | Positive       |
| chlorpromazine   | DILI Positive     | Positive              | Positive   | Positive       |
| cyclosporine     | DILI Positive     | Positive              | Positive   | Positive       |
| nefazodone       | DILI Positive     | Positive              | Positive   | Positive       |
| nomifensine      | DILI Positive     | Positive              | Negative   | Positive       |
| tamoxifen        | DILI Positive     | Positive              | Negative   | Positive       |
| zafirlukast      | DILI Positive     | Positive              | Negative   | Positive       |
| cisplatin        | DILI Positive     | Negative              | Negative   | Positive       |
| naltrexone       | DILI Positive     | Negative              | Negative   | Negative       |
| progesterone     | DILI Positive     | Negative              | Positive   | Positive       |
| azathioprine     | DILI Positive     | Negative              | Negative   | Negative       |
| busulfan         | DILI Positive     | Negative              | Negative   | Negative       |
| clonidine        | DILI Positive     | Negative              | Negative   | Negative       |
| cyclofenil       | DILI Positive     | Negative              | Positive   | Positive       |
| flutamide        | DILI Positive     | Negative              | Negative   | Negative       |
| mebendazole      | DILI Positive     | Negative              | Positive   | Positive       |
| methotrexate     | DILI Positive     | Negative              | Negative   | Negative       |
| moxisylyte       | DILI Positive     | Negative              | Positive   | Positive       |
| nifedipine       | DILI Positive     | Negative              | Negative   | Negative       |
| verapamil        | DILI Positive     | Negative              | Positive   | Positive       |
| bambuterol       | DILI Negative     | Negative              | Negative   | Negative       |
| biotin           | DILI Negative     | Negative              | Negative   | Negative       |
| buspirone        | DILI Negative     | Negative              | Negative   | Negative       |
| hydrocortisone   | DILI Negative     | Negative              | Negative   | Negative       |
| isoproterenol    | DILI Negative     | Negative              | Negative   | Negative       |
| loratadine       | DILI Negative     | Negative              | Negative   | Negative       |
| oxyphenonium     | DILI Negative     | Negative              | Negative   | Negative       |
| physostigmine    | DILI Negative     | Negative              | Negative   | Negative       |
| pinacidil        | DILI Negative     | Negative              | Negative   | Negative       |
| propranolol      | DILI Negative     | Negative              | Negative   | Negative       |
| pyridoxine       | DILI Negative     | Negative              | Negative   | Negative       |
| scopolamine      | DILI Negative     | Negative              | Negative   | Negative       |
| cromoglicic acid | DILI Negative     | Negative              | Negative   | Negative       |
| cyanocobalamin   | DILI Negative     | Negative              | Negative   | Negative       |
| daunorubicin     | DILI Negative     | Negative              | Negative   | Negative       |
| flumazenil       | DILI Negative     | Negative              | Negative   | Negative       |
| miconazole       | DILI Negative     | Negative              | Positive   | Positive       |
| acetaminophen    | DILI Positive     | Positive              | Negative   | Positive       |
| carbamazepine    | DILI Positive     | Positive              | Negative   | Positive       |
| carboplatin      | DILI Positive     | Positive              | Negative   | Positive       |
| chlorpropamide   | DILI Positive     | Positive              | Negative   | Positive       |
| clofibrate       | DILI Positive     | Positive              | Positive   | Positive       |
| cyclophosphamide | DILI Positive     | Positive              | Negative   | Positive       |
| hydroxyurea      | DILI Positive     | Positive              | Negative   | Positive       |
| ifosfamide       | DILI Positive     | Positive              | Negative   | Positive       |
| sulindac         | DILI Positive     | Positive              | Positive   | Positive       |
| tolbutamide      | DILI Positive     | Positive              | Negative   | Positive       |

|                  |               |          |          |          |
|------------------|---------------|----------|----------|----------|
| valproic acid    | DILI Positive | Positive | Negative | Positive |
| spironolactone   | DILI Positive | Negative | Negative | Negative |
| fenofibrate      | DILI Positive | Negative | Positive | Positive |
| penicillin g     | DILI Positive | Negative | Negative | Negative |
| allopurinol      | DILI Positive | Negative | Negative | Negative |
| phenytoin        | DILI Positive | Negative | Negative | Negative |
| captopril        | DILI Positive | Negative | Negative | Negative |
| chlormezanone    | DILI Positive | Negative | Negative | Negative |
| sulfamethoxazole | DILI Positive | Negative | Negative | Negative |
| propylthiouracil | DILI Positive | Negative | Negative | Negative |
| dacarbazine      | DILI Positive | Negative | Negative | Negative |
| felbamate        | DILI Positive | Negative | Negative | Negative |
| niacin           | DILI Positive | Negative | Negative | Negative |
| stavudine        | DILI Positive | Negative | Negative | Negative |
| zidovudine       | DILI Positive | Negative | Negative | Negative |
| isoniazid        | DILI Positive | Negative | Negative | Negative |
| indinavir        | DILI Positive | Negative | Positive | Positive |
| phenacetin       | DILI Positive | Negative | Negative | Negative |
| vitamin c        | DILI Negative | Negative | Negative | Negative |
| theophylline     | DILI Negative | Negative | Negative | Negative |
| aspirin          | DILI Negative | Negative | Negative | Negative |
| citric acid      | DILI Negative | Negative | Negative | Negative |

---
