# Supplementary material
Source: PubMed Central journal article supplement (PMC5753582)
Supplement: NIHMS927513-supplement-Table_2.pdf [file NIHMS927513-supplement-Table_2.pdf]

Supplemental Table 2. The prediction of drug-cytokines in vitro model, RO2 and their combination for published by (Cosgrove et al., 2009). 3 drugs were not unqualified for analysis, including TPCA-1 with no identity, erythromycin for a duplicate usage, and clotrimazole for its topical usage that the RO2 model does not work.

| Compounds            | Drug-cytokine in     |             |          |               |
|----------------------|----------------------|-------------|----------|---------------|
|                      | Human hepatotoxicity | vitro model | RO2      | RO2-cytokines |
| demeclocycline       | Hepatotoxic          | Positive    | Negative | Positive      |
| azathioprine         | Hepatotoxic          | Positive    | Negative | Positive      |
| retinoic acid        | Hepatotoxic          | Positive    | Negative | Positive      |
| menadione            | Hepatotoxic          | Positive    | Negative | Positive      |
| trovafloxacin        | Hepatotoxic          | Positive    | Negative | Positive      |
| quinine              | Hepatotoxic          | Positive    | Negative | Positive      |
| mexiletine           | Hepatotoxic          | Positive    | Negative | Positive      |
| nortriptyline        | Hepatotoxic          | Positive    | Negative | Positive      |
| benzbromarone        | Hepatotoxic          | Positive    | Positive | Positive      |
| amiodarone           | Hepatotoxic          | Positive    | Positive | Positive      |
| diclofenac           | Hepatotoxic          | Positive    | Positive | Positive      |
| chlorpromazine       | Hepatotoxic          | Positive    | Positive | Positive      |
| riluzole             | Hepatotoxic          | Positive    | Positive | Positive      |
| clomipramine         | Hepatotoxic          | Positive    | Positive | Positive      |
| albendazole          | Hepatotoxic          | Negative    | Positive | Positive      |
| danazol              | Hepatotoxic          | Negative    | Positive | Positive      |
| telithromycin        | Hepatotoxic          | Negative    | Positive | Positive      |
| troglitazone         | Hepatotoxic          | Negative    | Positive | Positive      |
| bepidil              | Hepatotoxic          | Negative    | Positive | Positive      |
| nefazodone           | Hepatotoxic          | Negative    | Positive | Positive      |
| progesterone         | Hepatotoxic          | Negative    | Positive | Positive      |
| mebendazole          | Hepatotoxic          | Negative    | Positive | Positive      |
| acetaminophen        | Hepatotoxic          | Negative    | Negative | Negative      |
| didanosine           | Hepatotoxic          | Negative    | Negative | Negative      |
| cyclophosphamide     | Hepatotoxic          | Negative    | Negative | Negative      |
| nimesulide           | Hepatotoxic          | Negative    | Negative | Negative      |
| fluconazole          | Hepatotoxic          | Negative    | Negative | Negative      |
| bromfenac            | Hepatotoxic          | Negative    | Negative | Negative      |
| lomefloxacin         | Hepatotoxic          | Negative    | Negative | Negative      |
| trazodone            | Hepatotoxic          | Negative    | Negative | Negative      |
| phenacetin           | Hepatotoxic          | Negative    | Negative | Negative      |
| chlorzoxazone        | Hepatotoxic          | Negative    | Negative | Negative      |
| captopril            | Hepatotoxic          | Negative    | Negative | Negative      |
| labetalol            | Hepatotoxic          | Negative    | Negative | Negative      |
| pyrimethamine        | Hepatotoxic          | Negative    | Negative | Negative      |
| diethylcarbamazepine | Hepatotoxic          | Negative    | Negative | Negative      |
| methotrexate         | Hepatotoxic          | Negative    | Negative | Negative      |
| quinapril            | Hepatotoxic          | Negative    | Negative | Negative      |
| tamoxifen            | Hepatotoxic          | Negative    | Negative | Negative      |
| hydrochlorothiazide  | Hepatotoxic          | Negative    | Negative | Negative      |
| methimazole          | Hepatotoxic          | Negative    | Negative | Negative      |
| nifedipine           | Hepatotoxic          | Negative    | Negative | Negative      |
| flutamide            | Hepatotoxic          | Negative    | Negative | Negative      |
| spironolactone       | Hepatotoxic          | Negative    | Negative | Negative      |
| nomifensine          | Hepatotoxic          | Negative    | Negative | Negative      |
| nicardipine          | Hepatotoxic          | Negative    | Negative | Negative      |
| nimodipine           | Hepatotoxic          | Negative    | Negative | Negative      |
| fluvoxamine          | Hepatotoxic          | Negative    | Negative | Negative      |

|                |                              |          |          |          |
|----------------|------------------------------|----------|----------|----------|
| bumetanide     | Hepatotoxic                  | Negative | Negative | Negative |
| busulphan      | Hepatotoxic                  | Negative | Negative | Negative |
| estrone        | Hepatotoxic                  | Negative | Negative | Negative |
| norgestrel     | Hepatotoxic                  | Negative | Negative | Negative |
| clarithromycin | Not or minimally hepatotoxic | Positive | Negative | Positive |
| bupropion      | Not or minimally hepatotoxic | Negative | Positive | Positive |
| maprotiline    | Not or minimally hepatotoxic | Negative | Positive | Positive |
| aspirin        | Not or minimally hepatotoxic | Negative | Negative | Negative |
| tacrine        | Not or minimally hepatotoxic | Negative | Negative | Negative |
| levofloxacin   | Not or minimally hepatotoxic | Negative | Negative | Negative |
| cimetidine     | Not or minimally hepatotoxic | Negative | Negative | Negative |
| ranitidine     | Not or minimally hepatotoxic | Negative | Negative | Negative |
| pioglitazone   | Not or minimally hepatotoxic | Negative | Negative | Negative |
| rosiglitazone  | Not or minimally hepatotoxic | Negative | Negative | Negative |
| glyburide      | Not or minimally hepatotoxic | Negative | Negative | Negative |
| benazepril     | Not or minimally hepatotoxic | Negative | Negative | Negative |
| amoxapine      | Not or minimally hepatotoxic | Negative | Negative | Negative |
| famotidine     | Not or minimally hepatotoxic | Negative | Negative | Negative |
| amitriptyline  | Not or minimally hepatotoxic | Negative | Negative | Negative |
| paroxetine     | Not or minimally hepatotoxic | Negative | Negative | Negative |
| fluoxetine     | Not or minimally hepatotoxic | Negative | Negative | Negative |
| colchicine     | Not or minimally hepatotoxic | Negative | Negative | Negative |
| moxifloxacin   | Not or minimally hepatotoxic | Negative | Negative | Negative |
| citalopram     | Not or minimally hepatotoxic | Negative | Negative | Negative |
| memantine      | Not or minimally hepatotoxic | Negative | Negative | Negative |
| phenelzine     | Not or minimally hepatotoxic | Negative | Negative | Negative |
| dexamethasone  | Not or minimally hepatotoxic | Negative | Negative | Negative |
| nadolol        | Not or minimally hepatotoxic | Negative | Negative | Negative |
| pindolol       | Not or minimally hepatotoxic | Negative | Negative | Negative |
| pyridostigmine | Not or minimally hepatotoxic | Negative | Negative | Negative |
| propranolol    | Not or minimally hepatotoxic | Negative | Negative | Negative |
| promethazine   | Not or minimally hepatotoxic | Negative | Negative | Negative |
| brompheniramin | Not or minimally hepatotoxic | Negative | Negative | Negative |
| oxybutynin     | Not or minimally hepatotoxic | Negative | Negative | Negative |
| loperamide     | Not or minimally hepatotoxic | Negative | Negative | Negative |
| buspirone      | Not or minimally hepatotoxic | Negative | Negative | Negative |
| bupivacaine    | Not or minimally hepatotoxic | Negative | Negative | Negative |
| nalmeffene     | Not or minimally hepatotoxic | Negative | Negative | Negative |
| erythromycin   | Not or minimally hepatotoxic | Negative | Negative | Negative |

---
